# Supplementary material for: Rising atmospheric CO 2 concentrations: the overlooked factor promoting SW Iberian Forest development across the LGM and the last deglaciation?
Source: Copernicus journal article supplement (doi:10.5194/egusphere-2024-3334), 2024-11-06
Supplement: Supplementary file 1 [file egusphere-2024-3334-supplement.pdf]

## **Rising atmospheric CO<sub>2</sub> concentrations: the overlooked factor promoting SW Iberian Forest development across the LGM and the last deglaciation?**

Gomes, Sandra.D.<sup>a,b,c\*</sup>

Fletcher, William.J.<sup>a</sup>

Stone, Abi<sup>a</sup>

Rodrigues, Teresa<sup>b,c</sup>

Rebotim, Andreia<sup>b,c</sup>

Oliveira, Dulce<sup>b,c</sup>

Sánchez Goñi, Maria. F.<sup>d,e</sup>

Abrantes, Fatima<sup>b,c</sup>

Naughton, Filipa<sup>b,c</sup>

<sup>a</sup> Quaternary Environments and Geoarchaeology, Department of Geography, School of Environment, Education and Development, The University of Manchester, Manchester, Oxford Road, Manchester, M13 9PL, United Kingdom;

<sup>b</sup> Divisão de Geologia e Georecursos Marinhos, Instituto Português do Mar e da Atmosfera (IPMA), Rua Alfredo Magalhães Ramalho 6, 1495-006 Lisboa, Portugal;

<sup>c</sup> Centro de Ciências do Mar (CCMAR), Universidade do Algarve, Campus de Gambelas, 8005 - 139 Faro, Portugal;

<sup>d</sup> École Pratique des Hautes Études, EPHE, PSL Université, Paris, France;

<sup>e</sup> Environnements et Paléoenvironnements Océaniques et Continentaux, UMR 5805, Université de Bordeaux, Pessac, France.

\*Corresponding author: E-mail: [sandra.domingues@manchester.ac.uk](mailto:sandra.domingues@manchester.ac.uk) (Sandra Domingues Gomes); Address: Quaternary Environments and Geoarchaeology, Department of Geography, School of Environment, Education and Development, The University of Manchester, Manchester, Oxford Road, Manchester, M13 9PL, United Kingdom

**Supplementary material (table and figures):**

**Table S1** – Description and interpretation of the pollen record from Site U1385A covering the last 23 ka. Pollen zones are designated after their correspondent Site ID (U1385), followed by the pollen zone number.

| Pollen Zones | Top Depth (crnmd) | Top Age (cal yr B.P.) | Pollen signature                                                                                                                                                                                                                                                                                                                                                                                                                                                            |
|--------------|-------------------|-----------------------|-----------------------------------------------------------------------------------------------------------------------------------------------------------------------------------------------------------------------------------------------------------------------------------------------------------------------------------------------------------------------------------------------------------------------------------------------------------------------------|
| U1385-5      | 0.80              | 4410                  | Highest values of TMF (~70%) and Mediterranean taxa (~15%), characterised by the increase of temperate and Mediterranean taxa and marked reduction of semi-desert taxa. Expansion of <i>Isoetes</i> undiff. After an initial increase to its maximum values reduction of TMF (~40%) and Mediterranean taxa (~5%) as well <i>Pinus</i> sp.; subtle expansion of heathland and semi-desert taxa. Increase in the <i>Taraxacum</i> -type group.                                |
| U1385-4      | 1.60              | 1105                  | Slight decrease of TMF (~30%) and Mediterranean taxa. Re-expansion of semi-desert taxa (~25%) at the beginning followed by a decrease along the zone.                                                                                                                                                                                                                                                                                                                       |
| U1385-3      | 1.80              | 12760                 | Re-expansion and establishment of TMF (~35%) and Mediterranean taxa (~10%) followed by the retraction and slowdown of the TMF, Mediterranean taxa, and slight increase of semi-desert taxa. Marked decline of semi-desert taxa, a gradual increase of TMF as well as Mediterranean taxa, and subtle expansion of heathland taxa by the end of the zone. Subtle recovery of the pioneer taxa as well as <i>Isoetes</i> sp. Start of the gradual decline of <i>Pinus</i> sp.. |
| U1385-2      | 2.38              | 15400                 | Highest values in <i>Pinus</i> sp. (~80%) as well as semi-desert taxa (reaching 55%). Slight decline of semi-desert taxa with a subtle increase in TMF (driven by the <i>Quercus deciduous</i> type). Additionally, there is an increase in Poaceae taxa.                                                                                                                                                                                                                   |
| U1385-1      | 2.95              | 18130                 | Semi-desert taxa still dominant, despite a modest decrease (~30% average). TMF consistent with the previous zone but an increase of <i>Alnus</i> is observed. Mediterranean taxa faintly recover at the expenses of <i>Quercus evergreen</i> and <i>Cistus</i> . Pioneer taxa are also showing a consistent pattern promoted by the presence of <i>Betula</i> and Cupressaceae. Dominance and subtle increase of semi-desert plants (average 35%) with                      |

a recover of the TMF (average ~10%). There is a faint expression of Mediterranean taxa at the start of the zone while the pioneer plants retracted. Marked expression of pioneer plants (Cupressaceae reaching 10%). High values of semi-desert taxa (~30%) as well Ericaceae (average ~10%).

---

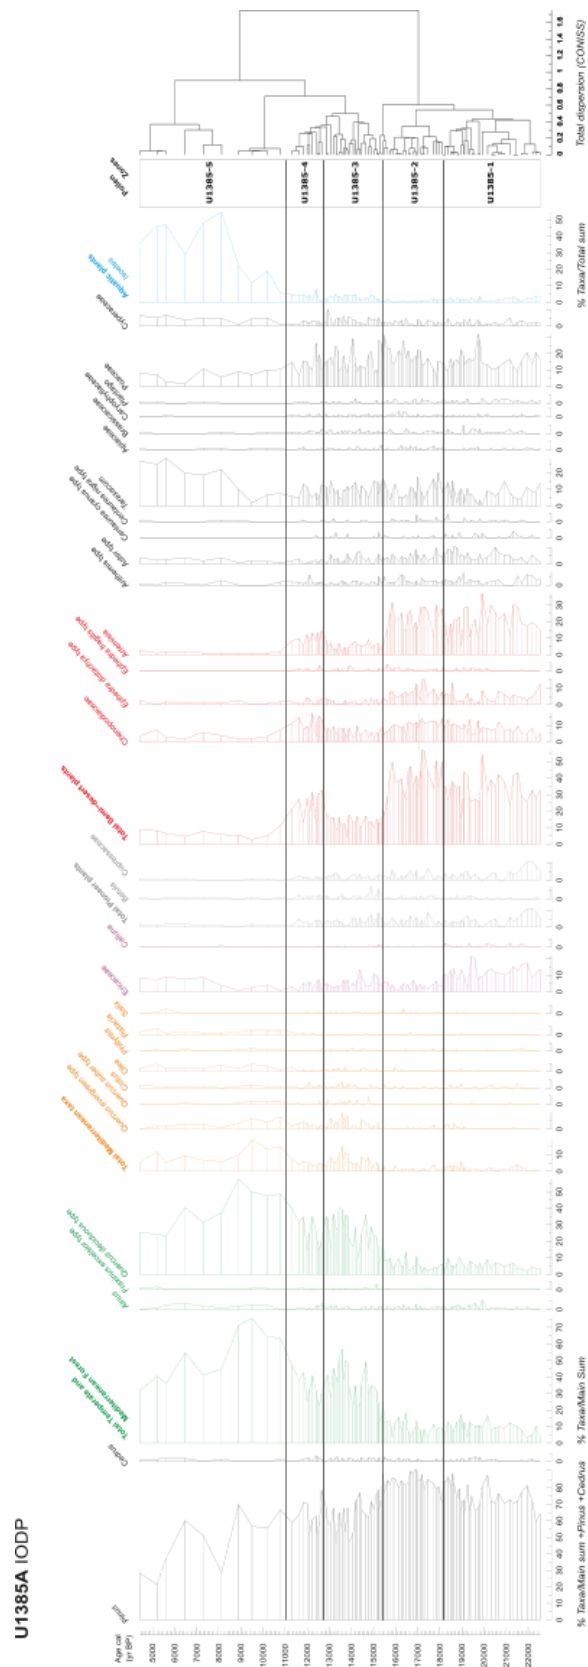

**Figure S1** – Pollen diagram for IODP Site U1385A covering the interval from 22550 to ~5000 cal yr B.P. (we extended the data to a younger age to give a better perspective of the taxa variation), showing the taxonomic groups aggregated by different colours, and respective CONISS zonation.

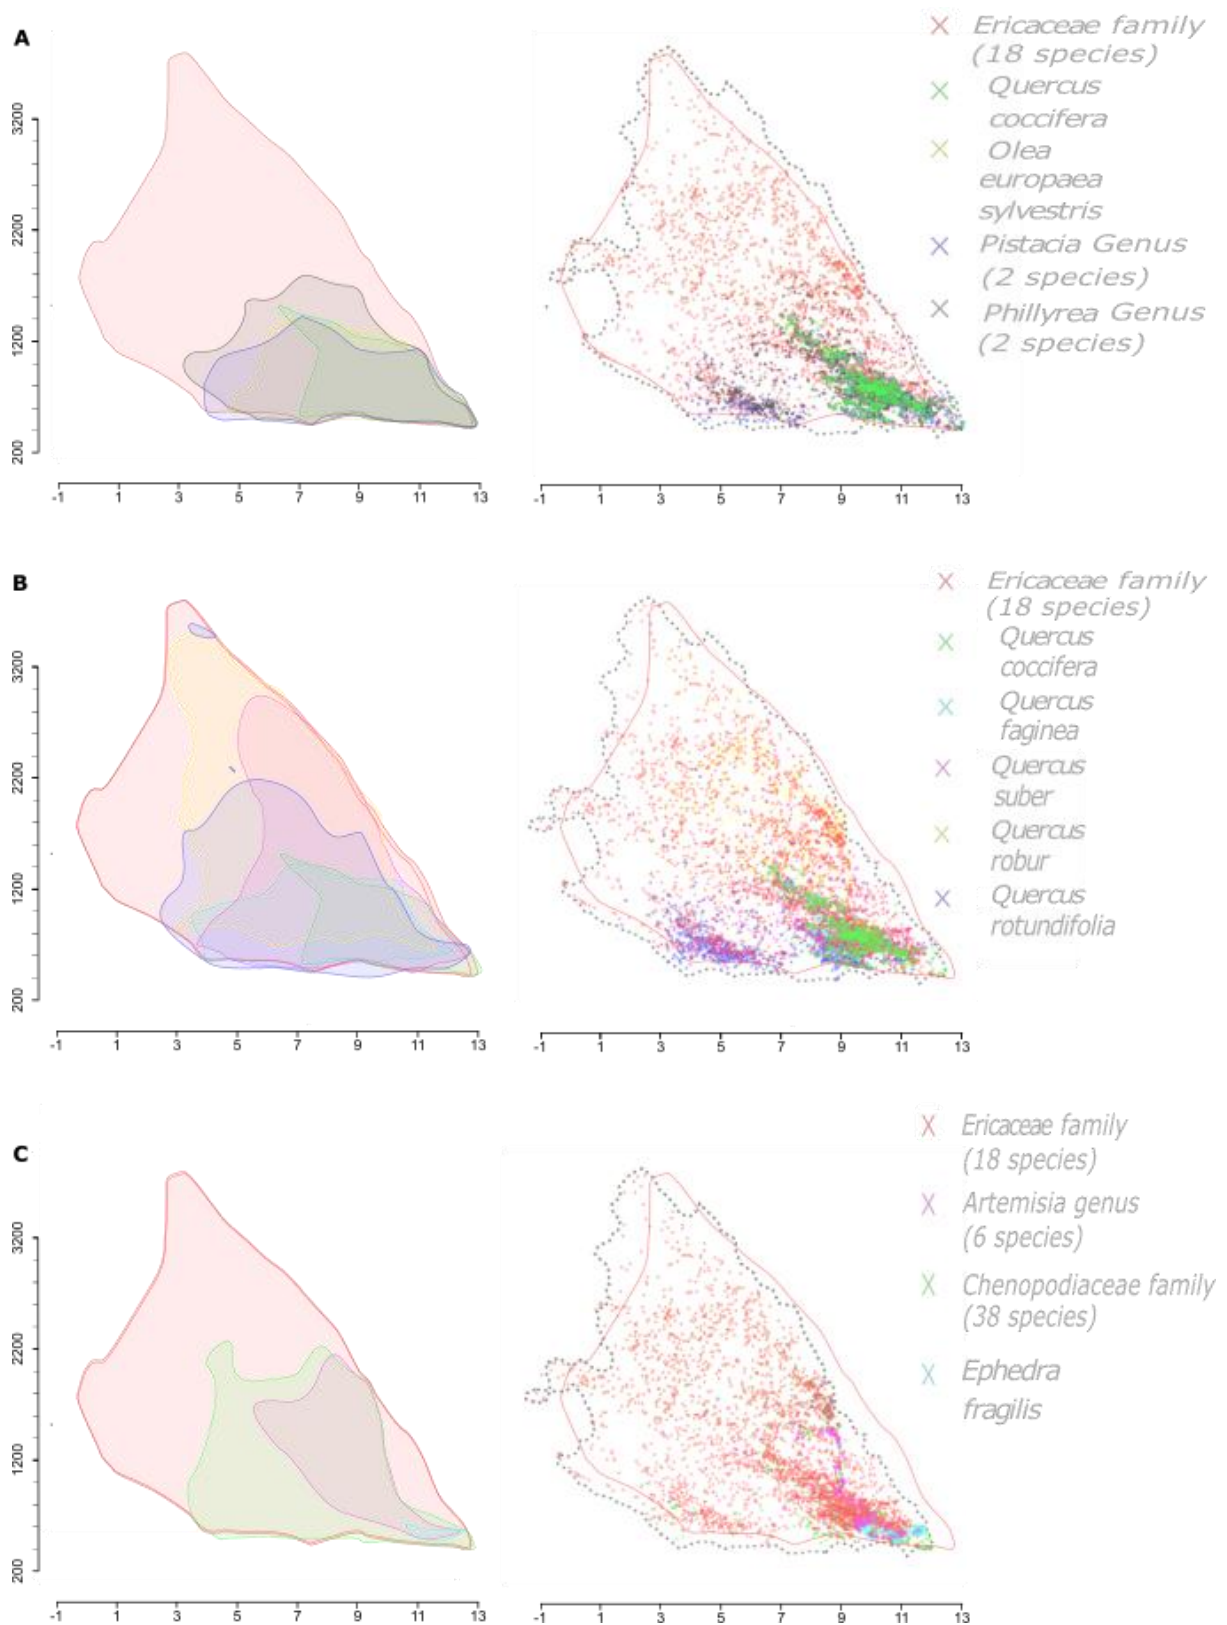

**Figure S2** – Environmental space (Annual precipitation Vs Minimum temperature) of different plant groups. a) Heathland vs M.F. (*Quercus coccifera* + *Olea europaea sylvestris* + *Pistacia* genus + *Phillyrea* genus); b) Heathland (Ericaceae family) vs TMF (represented by *Quercus* sp.); c) Heathland (Ericaceae family) vs Grassland (*Artemisia* spp. + Chenopodiaceae family + *Ephedra fragilis*). Source data: [www.flora-on.pt](http://www.flora-on.pt)
